# Supplementary material for: Structural evidence for Scc4-dependent localization of cohesin loading
Source: eLife journal article supplement (doi:10.7554/elife.06057), 2015-06-03
Supplement: supp [file elife_poa_e06057_Supplementary_File_2.docx]

**Supplementary File 2 – ChIP Primers**

| Primer set | Region (Fig.) | AM Primer | Sequence |
| --- | --- | --- | --- |
| IV-a1 | Arm ChrIV (4B) | 782 | AGATGAAACTCAGGCTACCA |
| 783 | TGCAACATCGTTAGTTCTTG |
| IV-c2 | *CEN4* (FB) | 794 | CCGAGGCTTTCATAGCTTA |
| 795 | ACCGGAAGGAAGAATAAGAA |
| IV-p1 | Pericen ChrIV (4B) | 1319 | ATGATTCAATGGATTTAGCC |
| 1320 | GTCAGTCTTATGCTGTTCCC |
| V-c1 | *CEN5* (S5A) | 945 | TGAAGGTGAGCTTAAGACAG |
| 946 | CAACCATGTTCGTAGCTAAA |
| V-a1 | Arm ChrV (S5A) | 949 | CTACGGTAAATCTGGGTAGG |
| 950 | TCCACTATCAAGTCACCAGA |
| III-c1 | *CEN3* (S5A) | 1279 | TGTTGATGGGTTTACAATTT |
| 1280 | CTTTCAATGATTGCTCTAAATC |
| III-a1 | Arm ChrIII (S5A) | 1285 | ATGGTACCTAGCTCGTGAAT |
| 1286 | GGATTTGTCAACTTGGAACT |
